# Supplementary material
Source: Springer Nature journal article supplement (https://www.springermedizin.de/resource/supplementary/12957_2010_675_MOESM2_ESM.pdf/9565480)

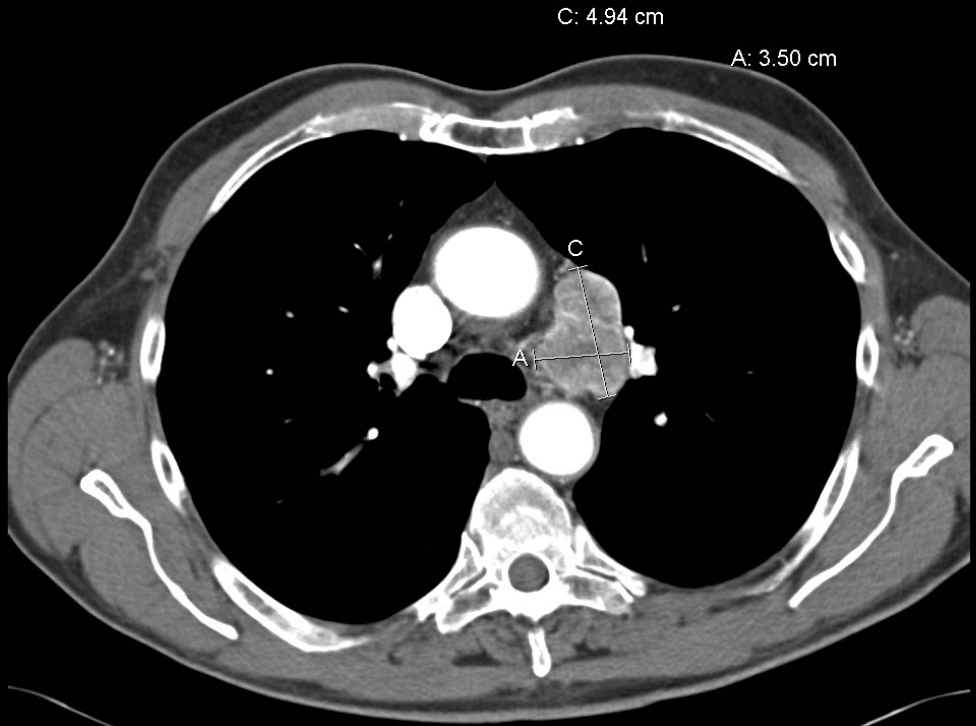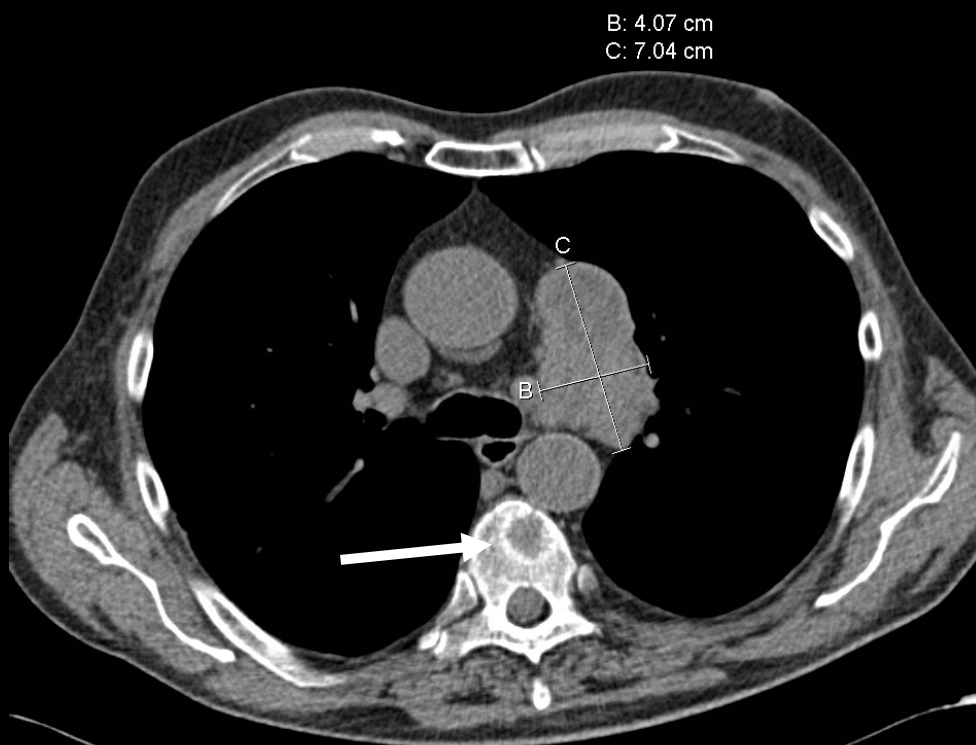

Supplement: MOESM2 [file 9565480]
